# Supplementary material for: A High-Resolution Linkage Map Construction and QTL Analysis for Morphological Traits in Anthurium (Anthurium andraeanum Linden)
Source: MDPI journal article supplement (doi:10.3390/plants12244185), 2023-12-17
Supplement: s1 [file s1]

**Table S1.** The markers showing segregation distortion in mapping population.

| Linkage Group ID | SLAF marker number | Segregation distortion marker number | Segregation distortion marker percentage (%) |
|------------------|--------------------|--------------------------------------|----------------------------------------------|
| LG1              | 290                | 23                                   | 7.93                                         |
| LG2              | 509                | 21                                   | 4.13                                         |
| LG3              | 127                | 1                                    | 0.78                                         |
| LG4              | 230                | 15                                   | 6.52                                         |
| LG5              | 266                | 74                                   | 27.82                                        |
| LG6              | 1,082              | 74                                   | 6.84                                         |
| LG7              | 573                | 32                                   | 5.59                                         |
| LG8              | 678                | 45                                   | 6.64                                         |
| LG9              | 615                | 25                                   | 4.07                                         |
| LG10             | 211                | 7                                    | 3.12                                         |
| LG11             | 338                | 11                                   | 3.25                                         |
| LG12             | 987                | 13                                   | 1.34                                         |
| LG13             | 973                | 26                                   | 2.67                                         |
| LG14             | 133                | 45                                   | 33.83                                        |
| LG15             | 1,159              | 17                                   | 1.47                                         |
| Total            | 8,171              | 429                                  | 5.25                                         |
