# Supplementary material for: A High-Resolution Linkage Map Construction and QTL Analysis for Morphological Traits in Anthurium (Anthurium andraeanum Linden)
Source: Plants (Basel). 2023 Dec 17;12(24):4185. doi: 10.3390/plants12244185 (PMC10747322; doi:10.3390/plants12244185)
Supplement: Supplementary file 1 [file plants-12-04185-s001.zip]

Archive with 5 entries (5 files):
- Figure S1. The integrity distribution map of all individuals..pdf
- Figure S2. The heat map for LG4..png
- Figure S3. The haplotype map for LG4..png
- plants-2703352-supplementary Table S1.pdf
- Supplementary Figure legends.pdf
