# Supplementary figures and images for: A High-Resolution Linkage Map Construction and QTL Analysis for Morphological Traits in Anthurium (Anthurium andraeanum Linden)
Source: MDPI journal article supplement (doi:10.3390/plants12244185), 2023-12-17

# Individuals Integrity

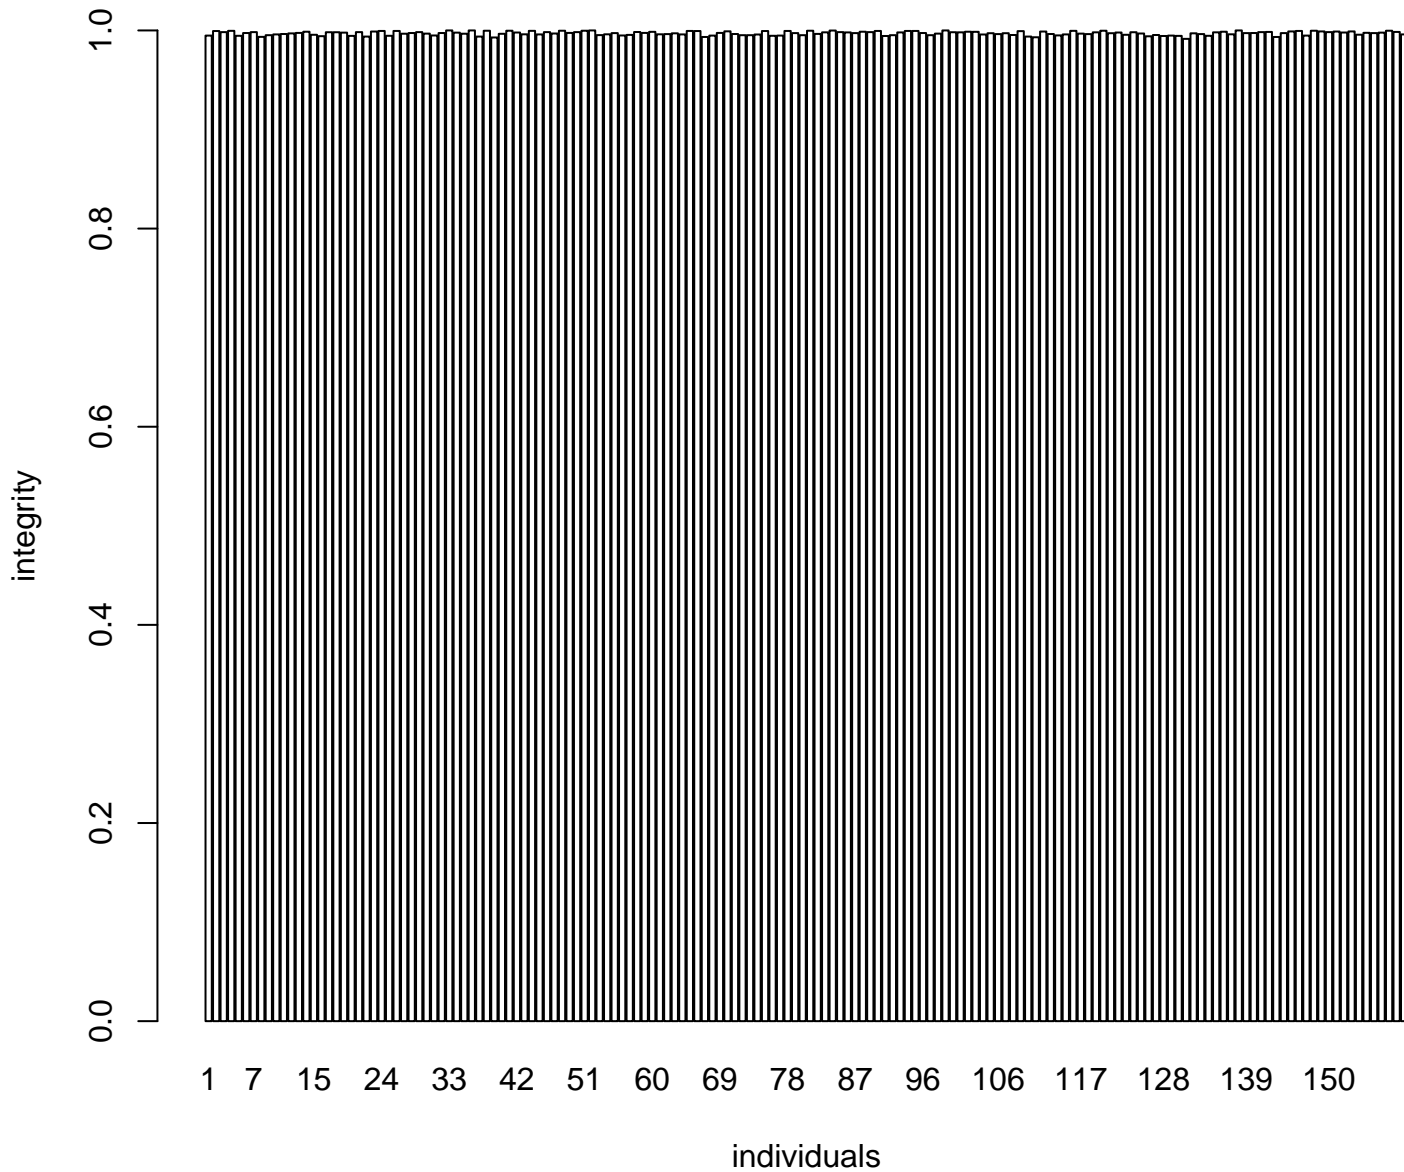

Supplement: s1 [file s1]
